# Supplementary material for: Kinetic study of oxidation of paracetamol by water-soluble colloidal MnO2 in the presence of an anionic surfactant
Source: Springer Nature journal article supplement (doi:10.1007/s00396-016-3921-8), 2016-07-28
Supplement: MOESM1 [file 10948342]

**Supporting figure caption**

**Fig. S1.** UV-visible spectral changes during the oxidation of paracetamol by colloidal MnO2 in the absence of surfactant in acidic medium at 298 K. (Conditions: [PCM] = 1.2 × 10-3, [MnO2] = 0.6 × 10-4 and [H2SO4] = 1.0 × 10-4 mol dm-3) with scanning with time. The time interval during scan was 10 min.

**Fig. S2.** Effect of [Mn(II)] on *k*obs for the oxidation of paracetamol by colloidal MnO2 at 298 K. (Conditions: [MnO2] = 1.2 × 10-4 mol dm-3, [H2SO4] = 1.0 × 10-4 mol dm-3, [PCM] = 1.2 × 10-3 mol dm-3, [SDS] = 8.0 × 10-3 mol dm-3 and [MnCl2] = (1) 1.0 × 10-5, (2) 2.0 × 10-5, (3) 3.0 × 10-5, (4) 4.0 × 10-5 and (5) 40.0 × 10-5, mol dm-3).

**Fig. S3.** First order plots for the oxidation of paracetamol by colloidal MnO2 in the presence of SDS at 298 K. (Conditions: [PCM] = 1.2 × 10-3 mol dm-3, [H2SO4] = 1.0 × 10-4 mol dm-3, [SDS] = 8.0 × 10-3 mol dm-3 and [MnO2] = (1) 0.4 × 10-4, (2) 0.6 × 10-4, (3) 0.9 × 10-4, (4) 1.2 × 10-4, (5) 1.5 × 10-4 and (6) 1.8 × 10-4 mol dm-3).

**Fig. S4.** Effect of [SDS] on *k*obs for the oxidation of paracetamol by colloidal MnO2 at 298 K. (Conditions: [PCM] =1.2 × 10-3 mol dm-3, [MnO2] = 1.2 × 10-4 mol dm-3 and [H2SO4] = 1.0 × 10-4 mol dm-3).

**Supporting table caption**

**Table S1.** Effect of [MnO2], [PCM] and [H2SO4] on the oxidation of paracetamol in the absence and presence of SDS at 298 K.

**Table S2.** Effect of solvent in percentage on the oxidation of paracetamol in the absence and presence of SDS at 298 K.

**Table S3.** Effect of [KCl], [KBr], [Na2SO4] and [MnCl2]on the oxidation of paracetamol in the absence and presence of SDS at 298 K.

**Table S4.** Effect of temperature on the oxidation of paracetamol in the absence and presence of SDS at 298 K.

**Table S5.** Effect of pH on the oxidation of paracetamol in the absence and presence of SDS at 298 K.

**
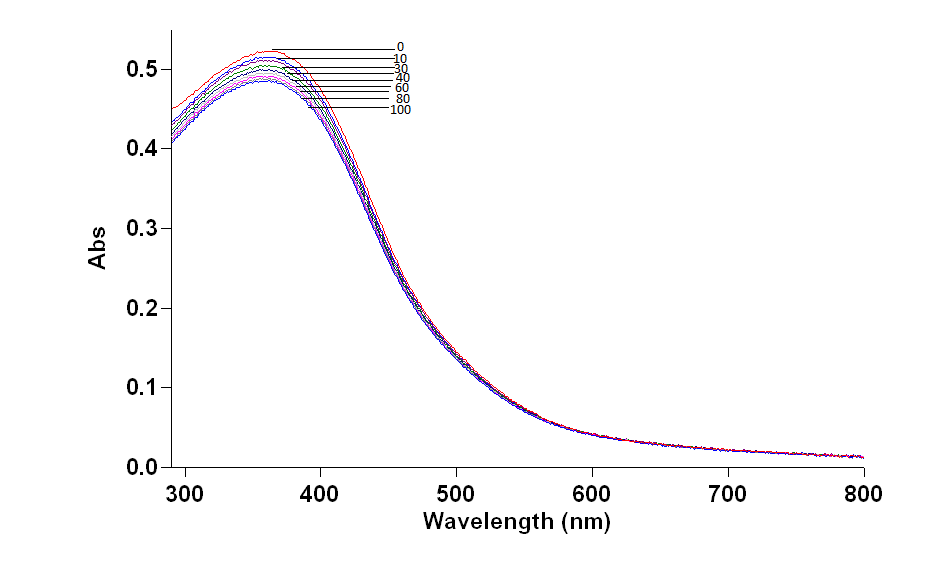
Fig. S1.** UV-visible spectral changes during the oxidation of paracetamol by colloidal MnO2 in the absence of surfactant in acidic medium at 298 K. (Conditions: [PCM] = 1.2 × 10-3, [MnO2] = 0.6 × 10-4 and [H2SO4] = 1.0 × 10-4 mol dm-3) with scanning time interval of 10 min.

**Fig. S2.** Effect of [Mn(II)] on *k*obs for the oxidation of paracetamol by colloidal MnO2 at 298 K. (Conditions: [MnO2] = 1.2 × 10-4 mol dm-3, [H2SO4] = 1.0 × 10-4 mol dm-3, [PCM] = 1.2 × 10-3 mol dm-3, [SDS] = 8.0 × 10-3 mol dm-3 and [MnCl2] = (1) 1.0 × 10-5, (2) 2.0 × 10-5, (3) 3.0 × 10-5, (4) 4.0 × 10-5 and (5) 40.0 × 10-5, mol dm-3).

**Fig. S3.** First order plots for the oxidation of paracetamol by colloidal MnO2 in the presence of SDS at 298 K. (Conditions: [PCM] = 1.2 × 10-3 mol dm-3, [H2SO4] = 1.0 × 10-4 mol dm-3, [SDS] = 8.0 × 10-3 mol dm-3 and [MnO2] = (1) 0.4 × 10-4, (2) 0.6 × 10-4, (3) 0.9 × 10-4, (4) 1.2 × 10-4, (5) 1.5 × 10-4 and (6) 1.8 × 10-4 mol dm-3).

**Fig. S4.** Effect of [SDS] on *k*obs for the oxidation of paracetamol by colloidal MnO2 at 298 K. (Conditions: [PCM] =1.2 × 10-3 mol dm-3, [MnO2] = 1.2 × 10-4 mol dm-3 and [H2SO4] = 1.0 × 10-4 mol dm-3).

**Table S1.** Effect of [MnO2], [PCM] and [H2SO4] on the oxidation of paracetamol in the absence and presence of SDS at 298 K.

Experimental conditions: [PCM] = 1.2 × 10-3 mol dm-3, [MnO2] = 1.2 × 10-4 mol dm-3, [H2SO4] = 1.0 × 10-4 mol dm-3 and [SDS] = 8.0 × 10-3 mol dm-3.

| [MnO2]  (10-4 mol dm-3) | [PCM]  (10-3 mol dm-3) | [H2SO4]  (10-4mol dm-3) | *k*obsinAqueous medium  (10-4 s-1) | *k*obsinSDS solution  (10-4 s-1) |
| --- | --- | --- | --- | --- |
| 0.4 | 1.2 | 1.0 | 6.40 | 27.69 |
| 0.6 | 1.2 | 1.0 | 5.53 | 26.64 |
| 0.9 | 1.2 | 1.0 | 2.43 | 11.54 |
| 1.2 | 1.2 | 1.0 | 1.94 | 7.69 |
| 1.5 | 1.2 | 1.0 | 1.15 | 6.69 |
| 1.8 | 1.2 | 1.0 | 1.07 | 4.46 |
| 1.2 | 0.6 | 1.0 | 0.83 | 3.46 |
| 1.2 | 0.9 | 1.0 | 1.35 | 5.92 |
| 1.2 | 1.2 | 1.0 | 1.94 | 7.69 |
| 1.2 | 1.5 | 1.0 | 2.09 | 9.01 |
| 1.2 | 1.8 | 1.0 | 2.42 | 11.11 |
| 1.2 | 2.1 | 1.0 | 2.94 | 12.72 |
| 1.2 | 2.4 | 1.0 | 3.62 | 14.43 |
| 1.2 | 1.2 | 0.2 | 0.48 | 2.14 |
| 1.2 | 1.2 | 0.5 | 1.05 | 4.61 |
| 1.2 | 1.2 | 1.0 | 1.94 | 7.69 |
| 1.2 | 1.2 | 1.5 | 3.15 | 12.20 |
| 1.2 | 1.2 | 1.75 | 3.99 | 13.89 |
| 1.2 | 1.2 | 2.0 | 4.61 | 15.36 |

**Table S2.** Effect of Solvent in percentage on the oxidation of paracetamol in the absence and presence of SDS at 298 K.

Experimental conditions: [PCM] = 1.2 × 10-3 mol dm-3, [MnO2] = 1.2 × 10-4 mol dm-3, [H2SO4] = 1.0 × 10-4 mol dm-3 and [SDS] = 8.0 × 10-3 mol dm-3.

| [CH3CN] %(v/v) | *D* | *k*obsinAqueous medium  (10-4 s-1) | *k*obsinSDS solution  (10-4 s-1) |
| --- | --- | --- | --- |
| 0.0 | 78.2 | 1.94 | 7.69 |
| 5.0 | 76.16 | 1.51 | 5.63 |
| 10.0 | 74.13 | 1.26 | 3.88 |
| 15.0 | 72.10 | 1.03 | 2.24 |
| 20.0 | 70.06 | 0.88 | 1.25 |
| 25.0 | 68.02 | 0.56 | 0.67 |

**Table S3.** Effect of [KCl], [KBr], [Na2SO4] and [MnCl2]on the oxidation of paracetamol in the absence and presence of SDS at 298 K.

Experimental conditions: [PCM] = 1.2 × 10-3 mol dm-3, [MnO2] = 1.2 × 10-4 mol dm-3, [H2SO4] = 1.0 × 10-4 mol dm-3 and [SDS] = 8.0 × 10-3 mol dm-3.

| [KCl]  (10-3mol dm-3) | [KBr]  (10-3mol dm-3) | [Na2SO4]  (10-3mol dm-3) | [MnCl2]  (10-5mol dm-3) | *k*obsinAqueous medium  (10-4 s-1) | *k*obsinSDS solution  (10-4 s-1) |
| --- | --- | --- | --- | --- | --- |
| 0.0 | ---- | ---- | ---- | 1.94 | 7.69 |
| 0.2 | ---- | ---- | ---- | 1.93 | 7.70 |
| 0.4 | ---- | ---- | ---- | 1.93 | 7.69 |
| 0.6 | ---- | ---- | ---- | 1.94 | 7.69 |
| 0.8 | ---- | ---- | ---- | 1.91 | 7.68 |
| 1.0 | ---- | ---- | ---- | 1.90 | 7.69 |
| ---- | 0.0 | ---- | ---- | 1.94 | 7.69 |
| ---- | 0.2 | ---- | ---- | 1.92 | 7.68 |
| ---- | 0.4 | ---- | ---- | 1.93 | 7.70 |
| ---- | 0.6 | ---- | ---- | 1.94 | 7.69 |
| ---- | 0.8 | ---- | ---- | 1.94 | 7.68 |
| ---- | 1.0 | ---- | ---- | 1.94 | 7.70 |
| ---- | ---- | 0.0 | ---- | 1.94 | 7.69 |
| ---- | ---- | 0.2 | ---- | 1.92 | 7.69 |
| ---- | ---- | 0.4 | ---- | 1.93 | 7.70 |
| ---- | ---- | 0.6 | ---- | 1.94 | 7.69 |
| ---- | ---- | 0.8 | ---- | 1.94 | 7.70 |
| ---- | ---- | 1.0 | ---- | 1.16 | 7.71 |
| ---- | ---- | ---- | 0.0 | 1.94 | 7.69 |
| ---- | ---- | ---- | 1.0 | 1.53 | 6.42 |
| ---- | ---- | ---- | 2.0 | 1.42 | 5.89 |
| ---- | ---- | ---- | 3.0 | 1.30 | 5.26 |
| ---- | ---- | ---- | 4.0 | 1.19 | 4.95 |
| ---- | ---- | ---- | 40.0 | 0.84 | 3.31 |

**Table S4.** Effect of temperature on the oxidation of paracetamol in the absence and presence of SDS at 298 K.

Experimental conditions: [PCM] = 1.2 × 10-3 mol dm-3, [MnO2] = 1.2 × 10-4 mol dm-3, [H2SO4] = 1.0 × 10-4 mol dm-3 and [SDS] = 8.0 × 10-3 mol dm-3.

| Temperature (K) | *k*obsinAqueous medium  (10-4 s-1) | *k*obsinSDS solution  (10-4 s-1) |
| --- | --- | --- |
| 293 | 1.45 | 6.39 |
| 298 | 1.94 | 7.69 |
| 303 | 3.55 | 13.47 |
| 308 | 4.47 | 17.11 |
| 313 | 7.51 | 23.38 |

**Table S5.** Effect of pH on the oxidation of paracetamol in the absence and presence of SDS at 298 K.

| pH in the absence of SDS | *k*obs (10-4 s-1) | pH in the presence of SDS | *k*obs (10-4 s-1) |
| --- | --- | --- | --- |
| 4.38 | 0.48 | 6.52 | 2.14 |
| 4.24 | 1.05 | 6.15 | 4.61 |
| 3.90 | 1.94 | 5.55 | 7.69 |
| 3.68 | 3.15 | 4.61 | 12.20 |
| 3.60 | 3.99 | 4.35 | 13.89 |
| 3.53 | 4.61 | 4.14 | 15.36 |
|  | | | |
